# Supplementary material for: In Vitro Evaluation of the Phytopharmacological Potential of Sargassum incisifolium for the Treatment of Inflammatory Bowel Diseases
Source: PubMed Central journal article supplement (PMC6631261; doi:10.3390/medicines6020049), 2019-04-06
Supplement: medicines-06-00049-s001.pdf [file medicines-06-00049-s001.pdf]

# Supplementary Materials: In Vitro Evaluation of the Phytopharmacological Potential of *Sargassum incisifolium* for the Treatment of Inflammatory Bowel Diseases

Mutenta N. Nyambe, Trevor C. Koekemoer, Maryna van de Venter, Eleonora D. Goosen and Denzil R. Beukes

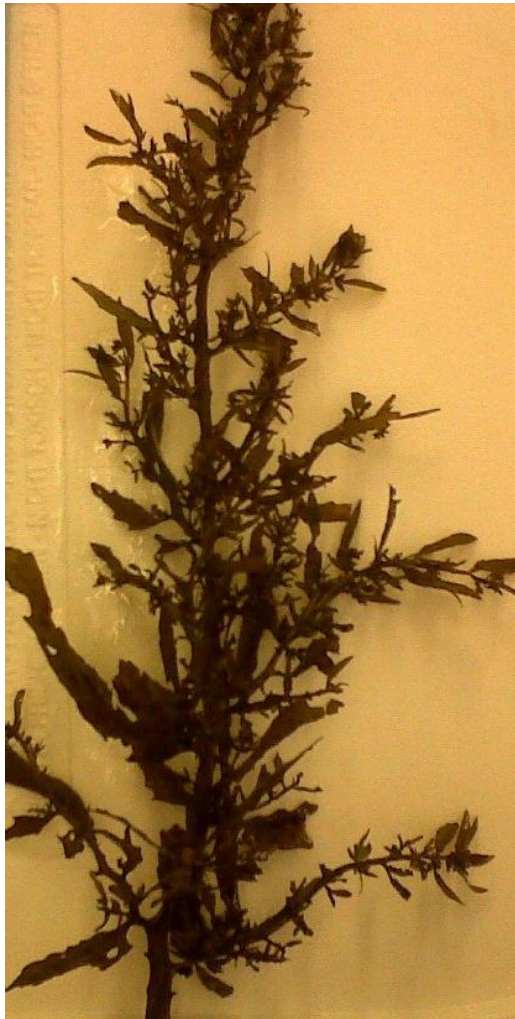

*Sargassum incisifolium*

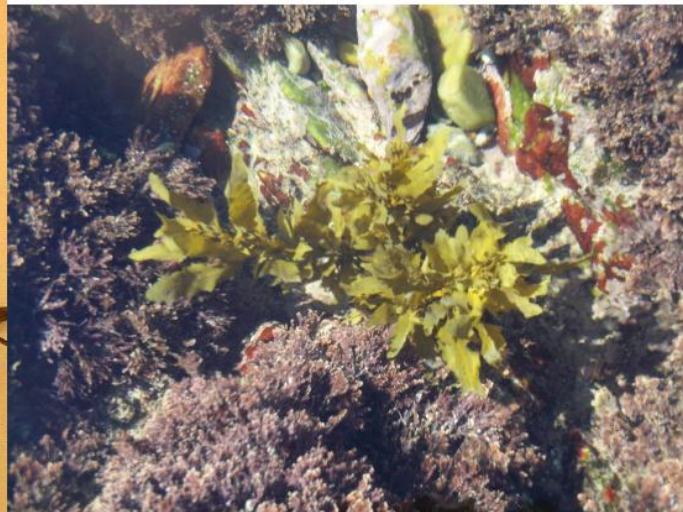

**Figure S1.** Photograph of *S. incisifolium* specimen used in this study.

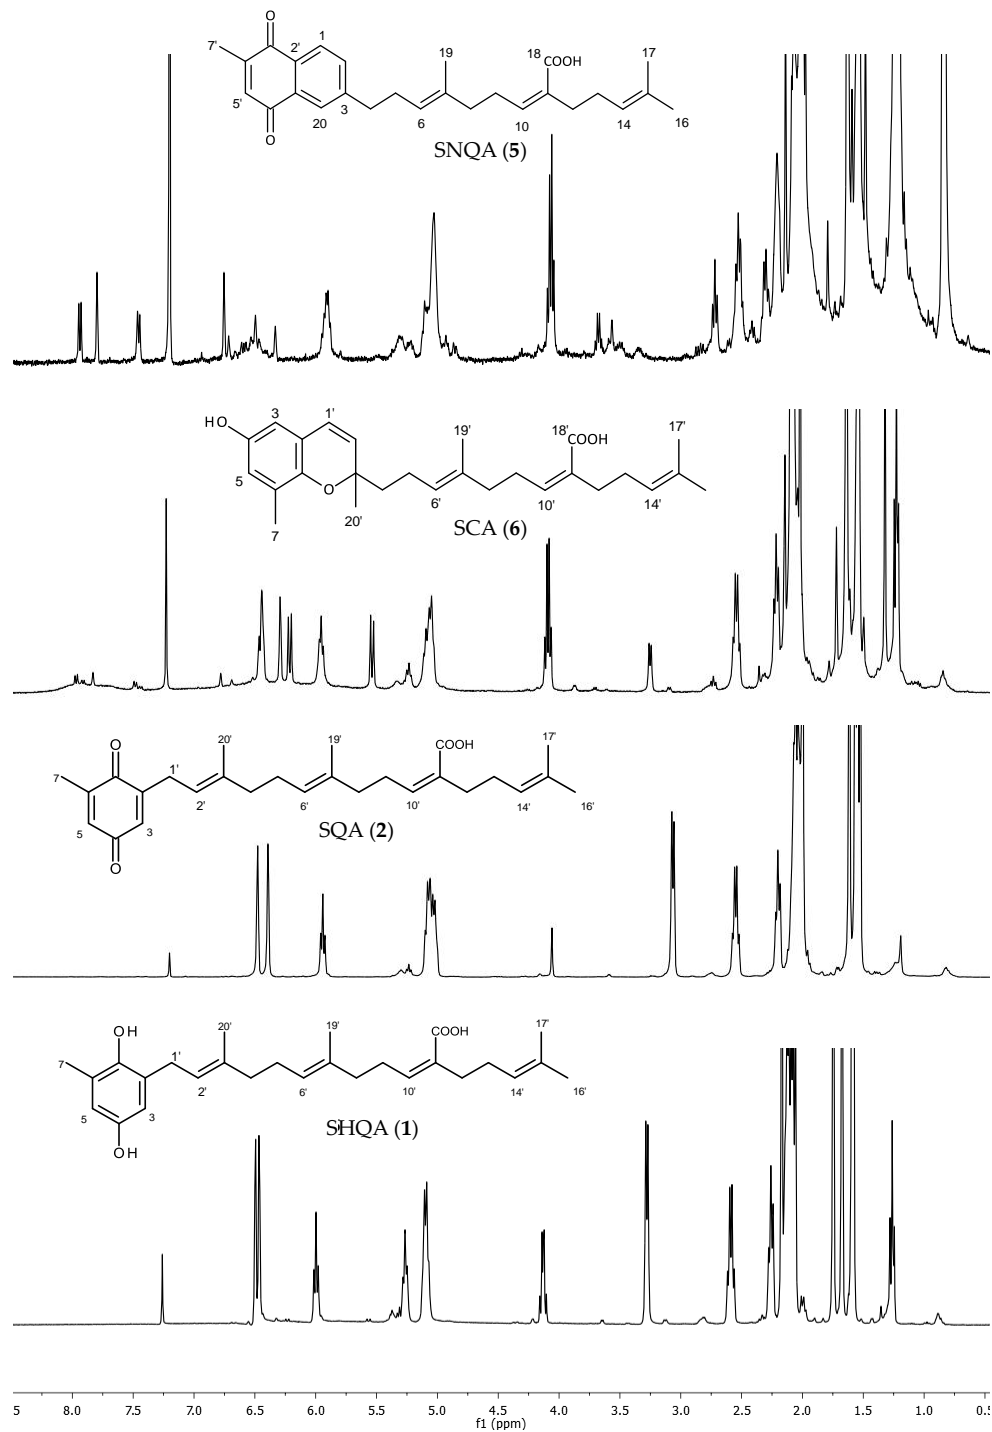

**Figure S2.**  $^1\text{H}$  NMR spectra (CDCl<sub>3</sub>, 400 MHz) for sargahydroquinic acid (1), sargaquinoic acid (2), sargachromenoic acid (6) and sarganaphthoquinic acid (5).

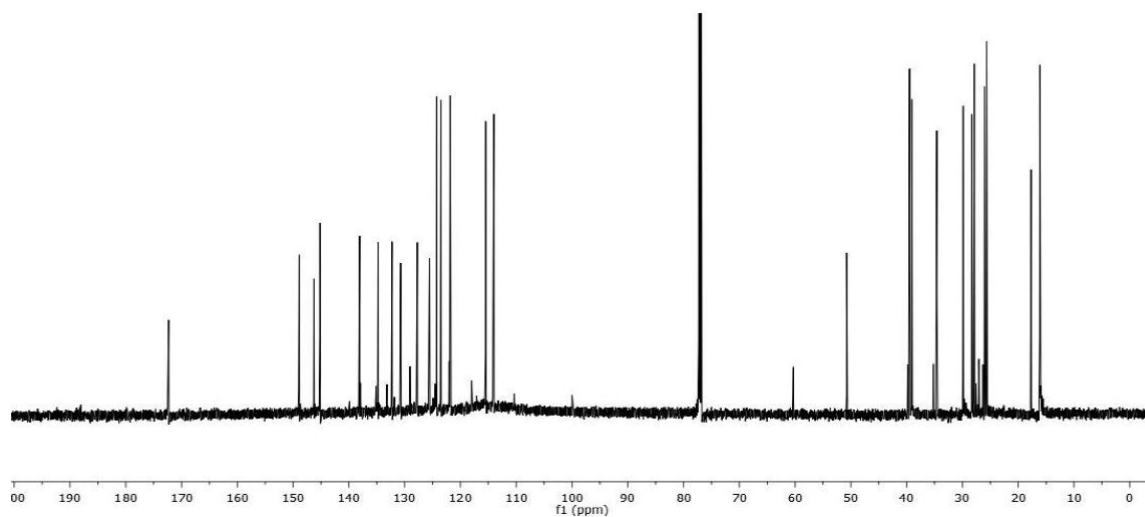

Figure S3.  $^{13}\text{C}$  NMR spectrum ( $\text{CDCl}_3$ , 100 MHz) of sargahydroquinoic acid (1).

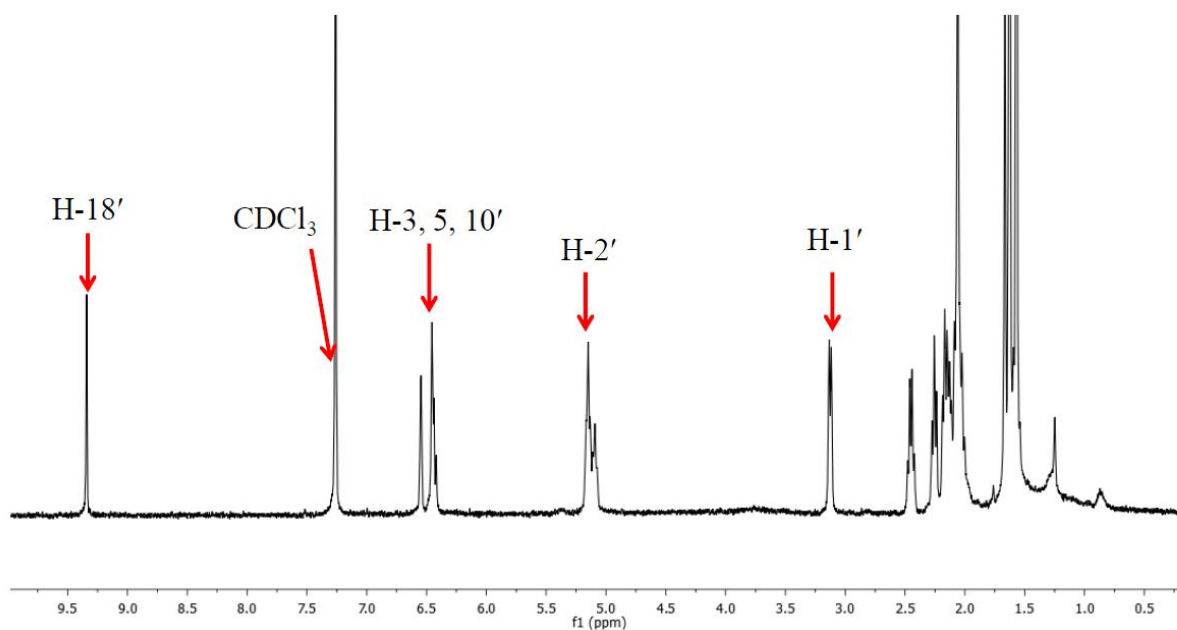

Figure S4.  $^1\text{H}$  NMR spectrum ( $\text{CDCl}_3$ , 400 MHz) of  $10'E$ -sargaquinal (4).

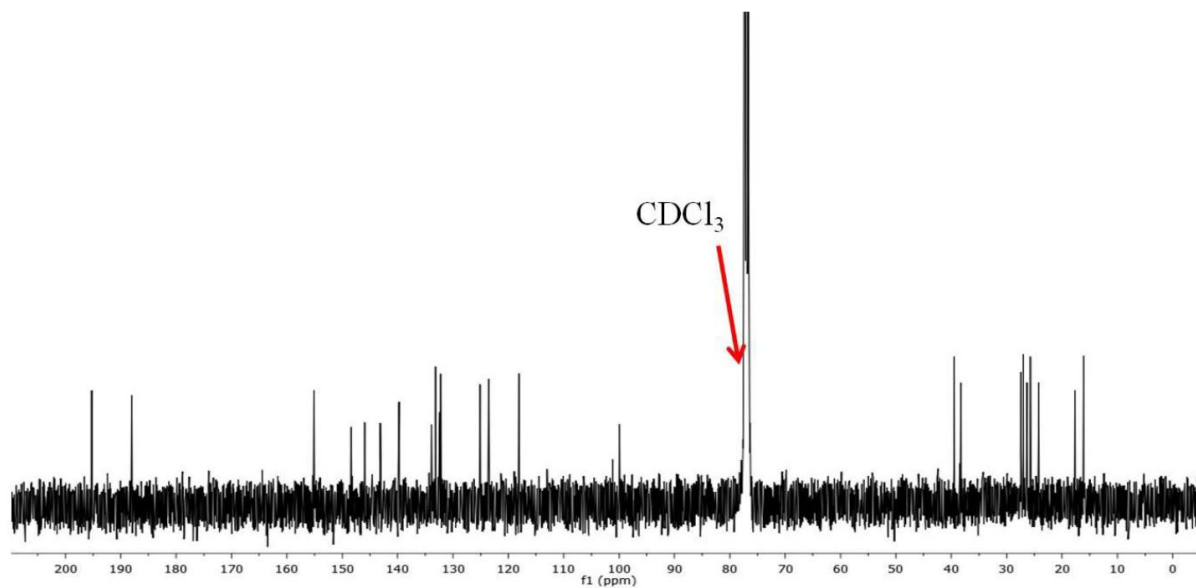

Figure S5.  $^{13}\text{C}$  NMR spectrum ( $\text{CDCl}_3$ , 100 MHz) of 10'E-sargaquinal (4).

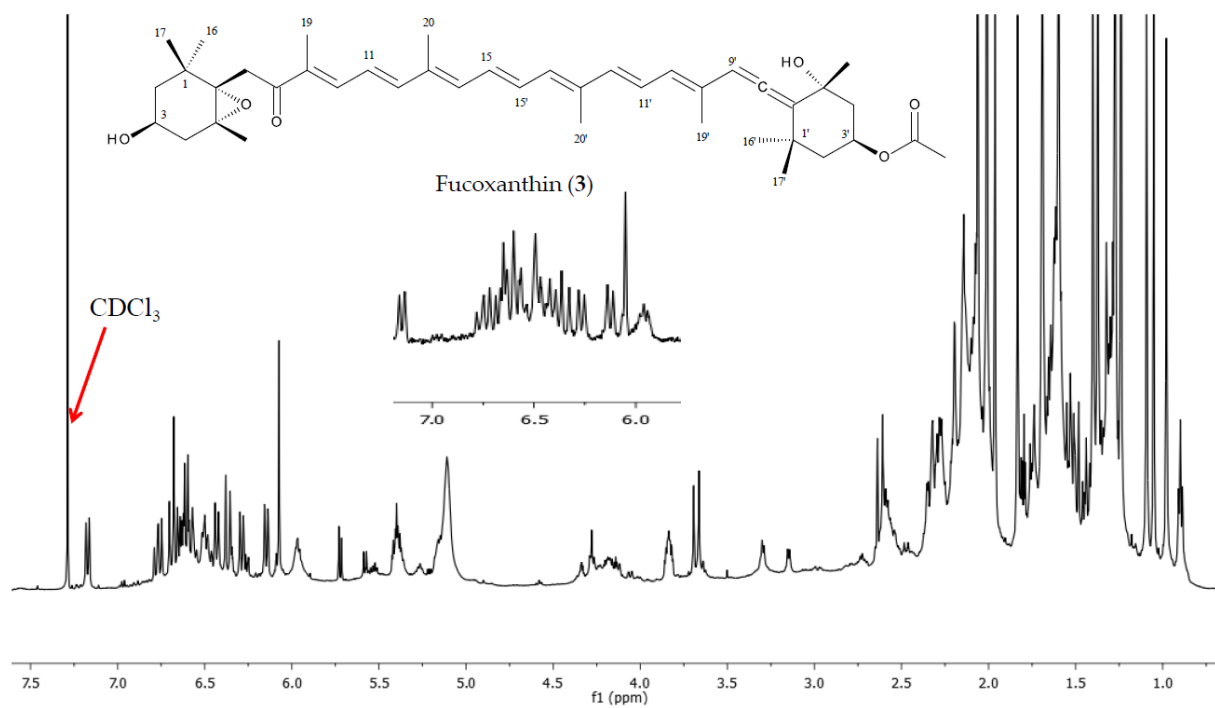

Figure S6.  $^1\text{H}$  NMR spectrum ( $\text{CDCl}_3$ , 400 MHz) of fucoxanthin (3).

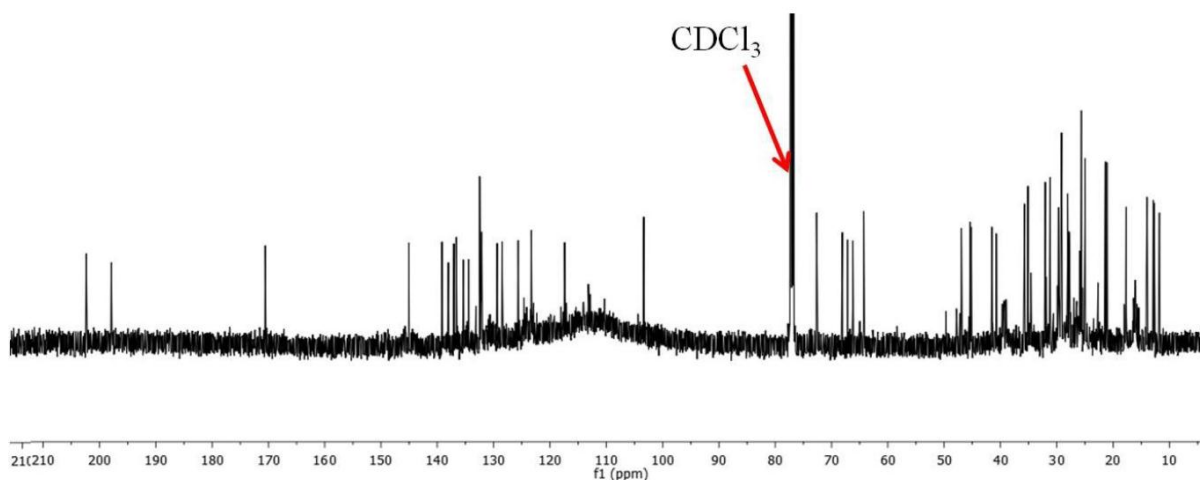

Figure S7. <sup>13</sup>C NMR spectrum (CDCl<sub>3</sub>, 100 MHz) of fucoxanthin (3).

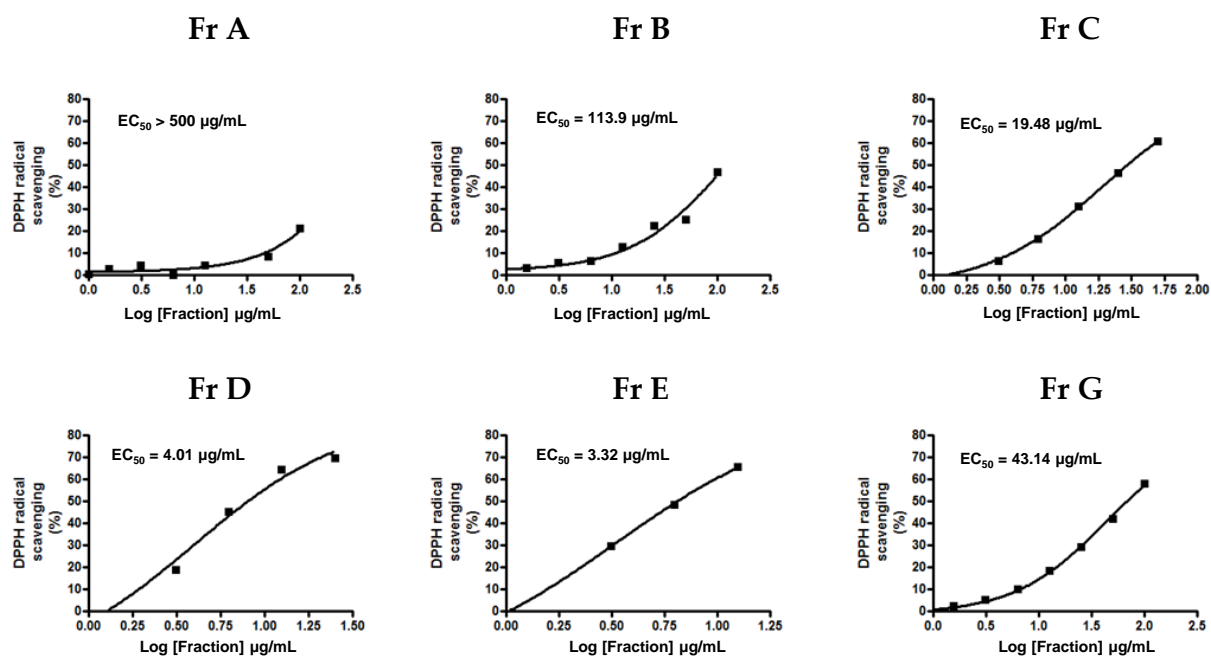

Figure S8. Titration curves for the DPPH radical scavenging activity of *Sargassum incisifolium* crude fractions Fr A, Fr B, Fr C, Fr D, Fr E and Fr G.

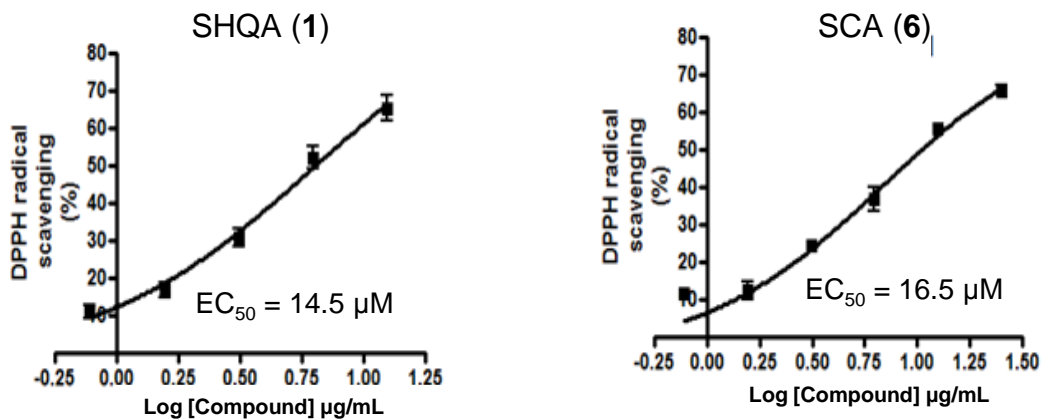

Figure S9. Titration curves for the DPPH radical scavenging activity of SHQA (1) and SCA (6).

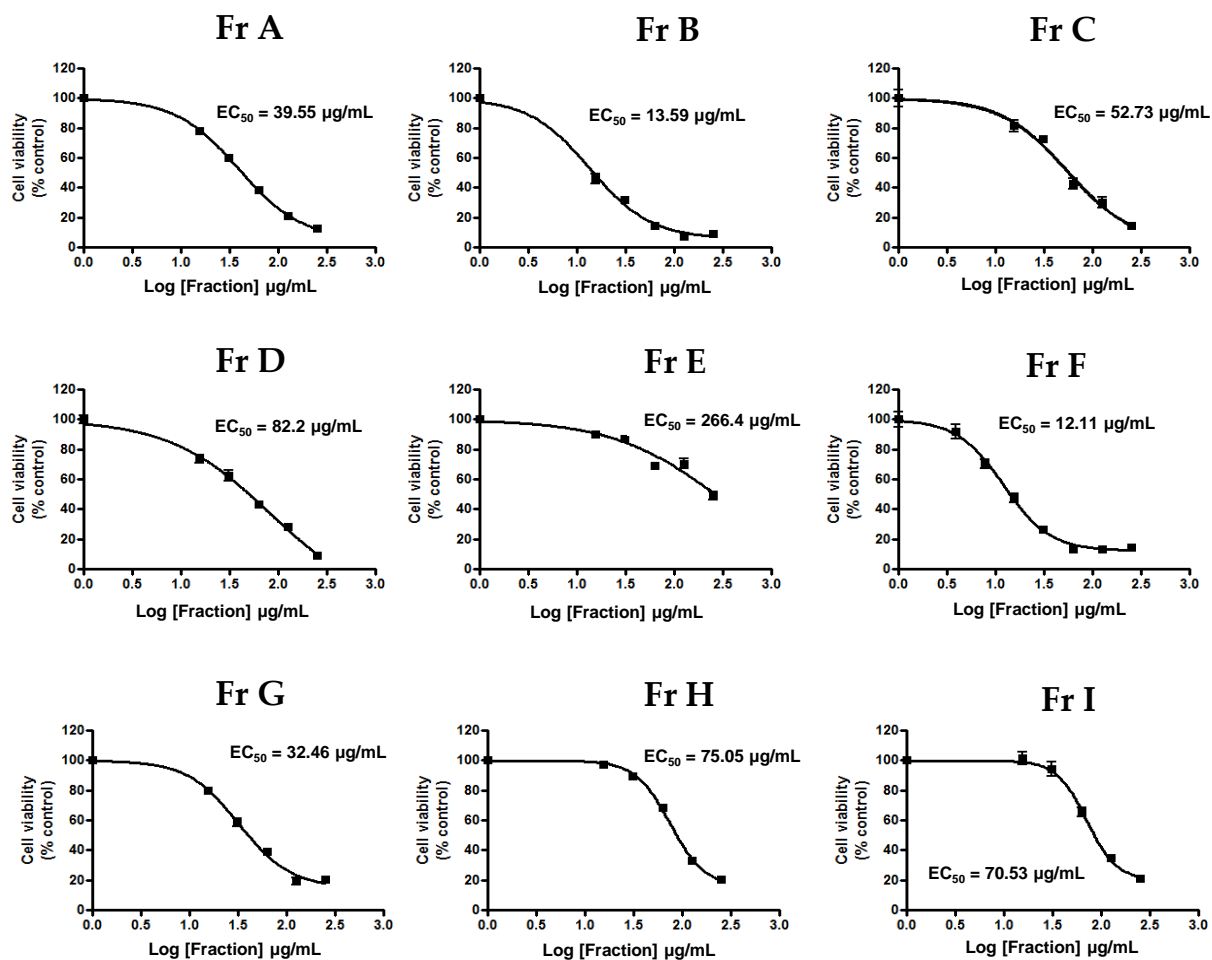

Figure S10. Dose dependent inhibition of HeLa cell viability by *S. incisifolium* fractions Fr A–I.

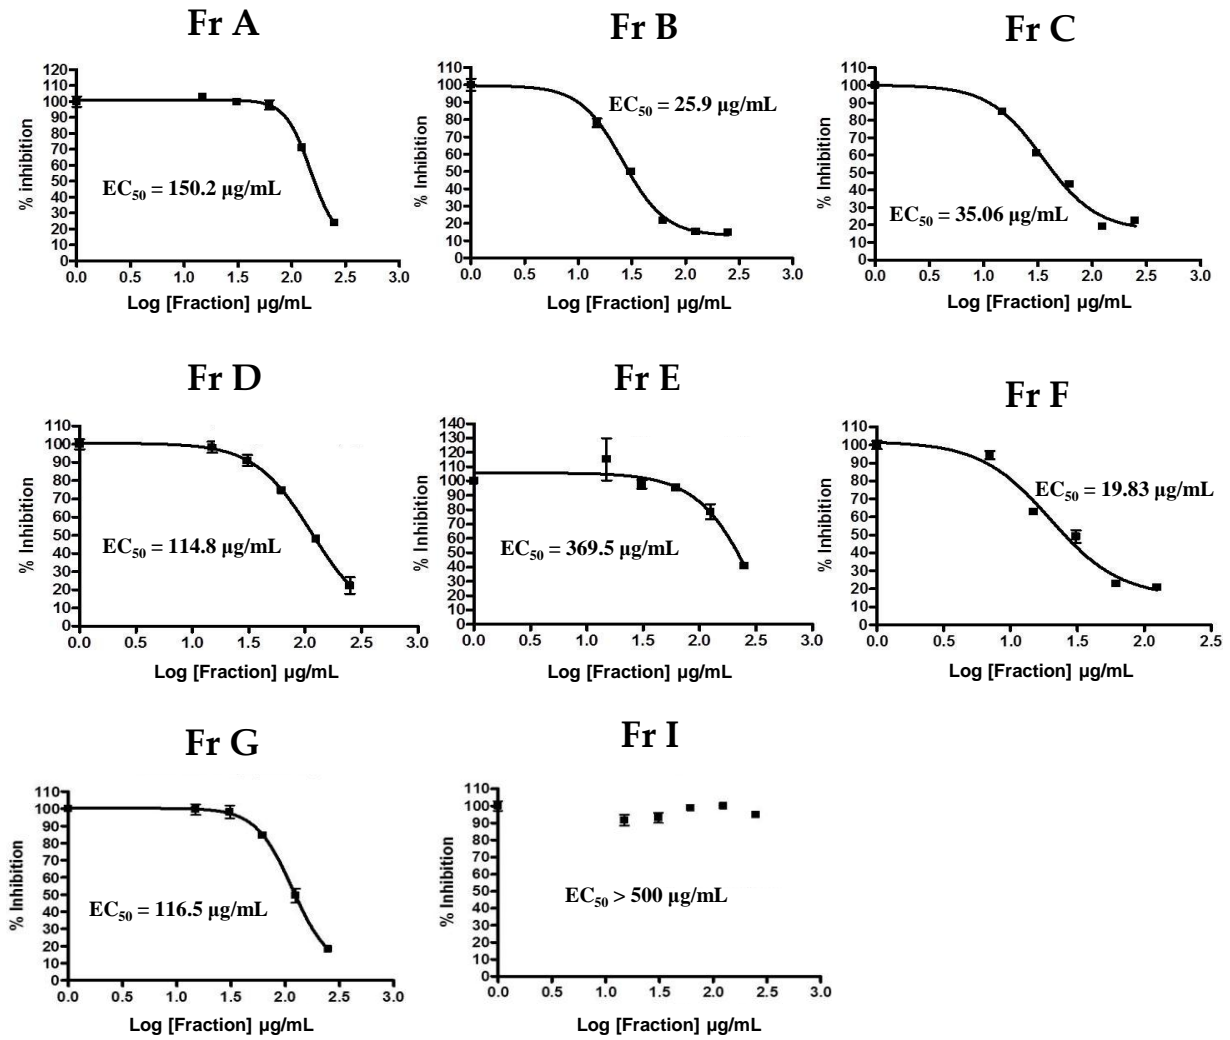

Figure S11. Dose dependent inhibition of HT-29 cell viability by *S. incisifolium* fractions.

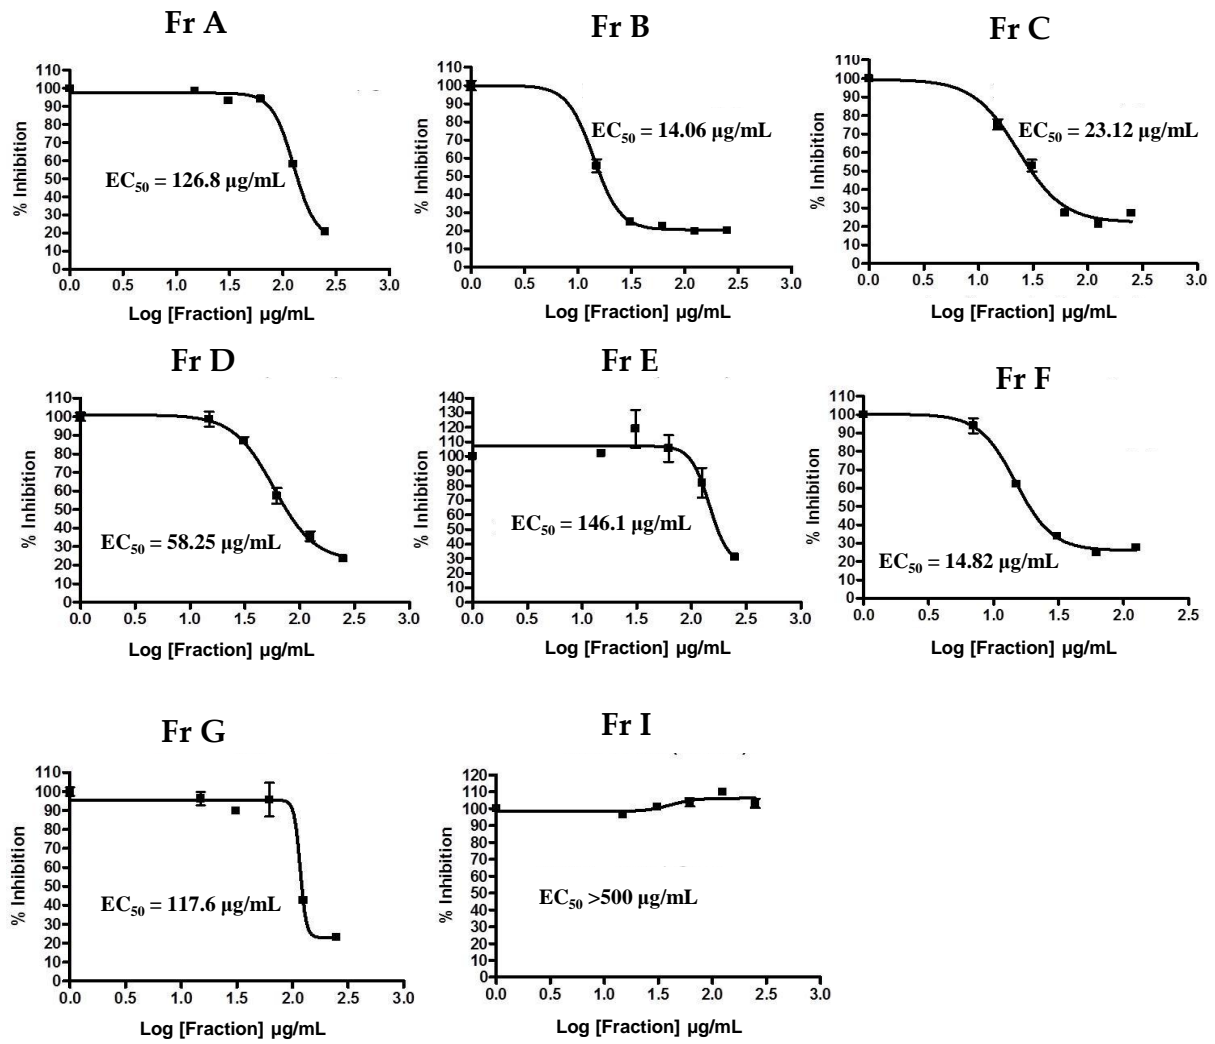

Figure S12. Dose dependent inhibition of Caco-2 cell viability by *S. incisifolium* fractions.



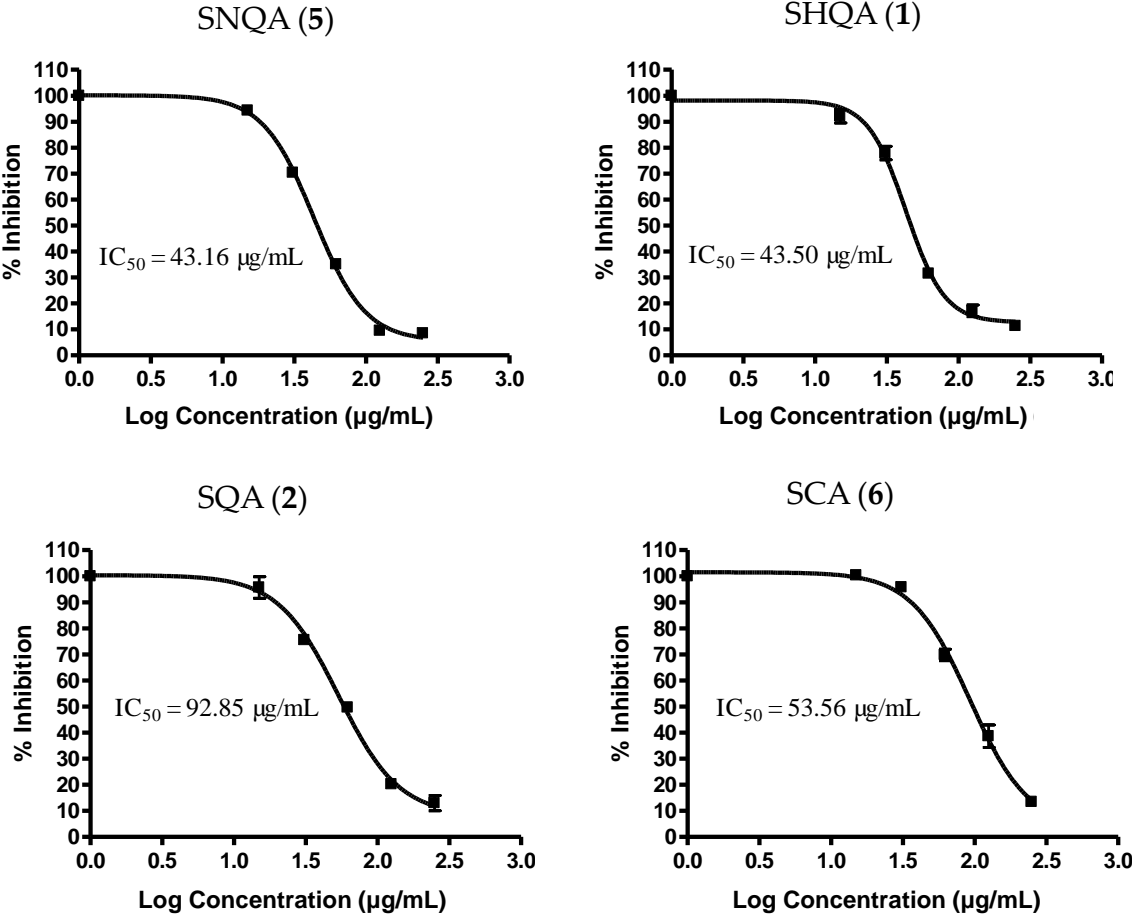

Figure S13. Dose dependent inhibition of HeLa cell viability by sarganaphthoquinic acid (5), sargahydroquinic acid (1), sargaquinic acid (2) and sargachromenoic acid (6).

## Extraction and isolation

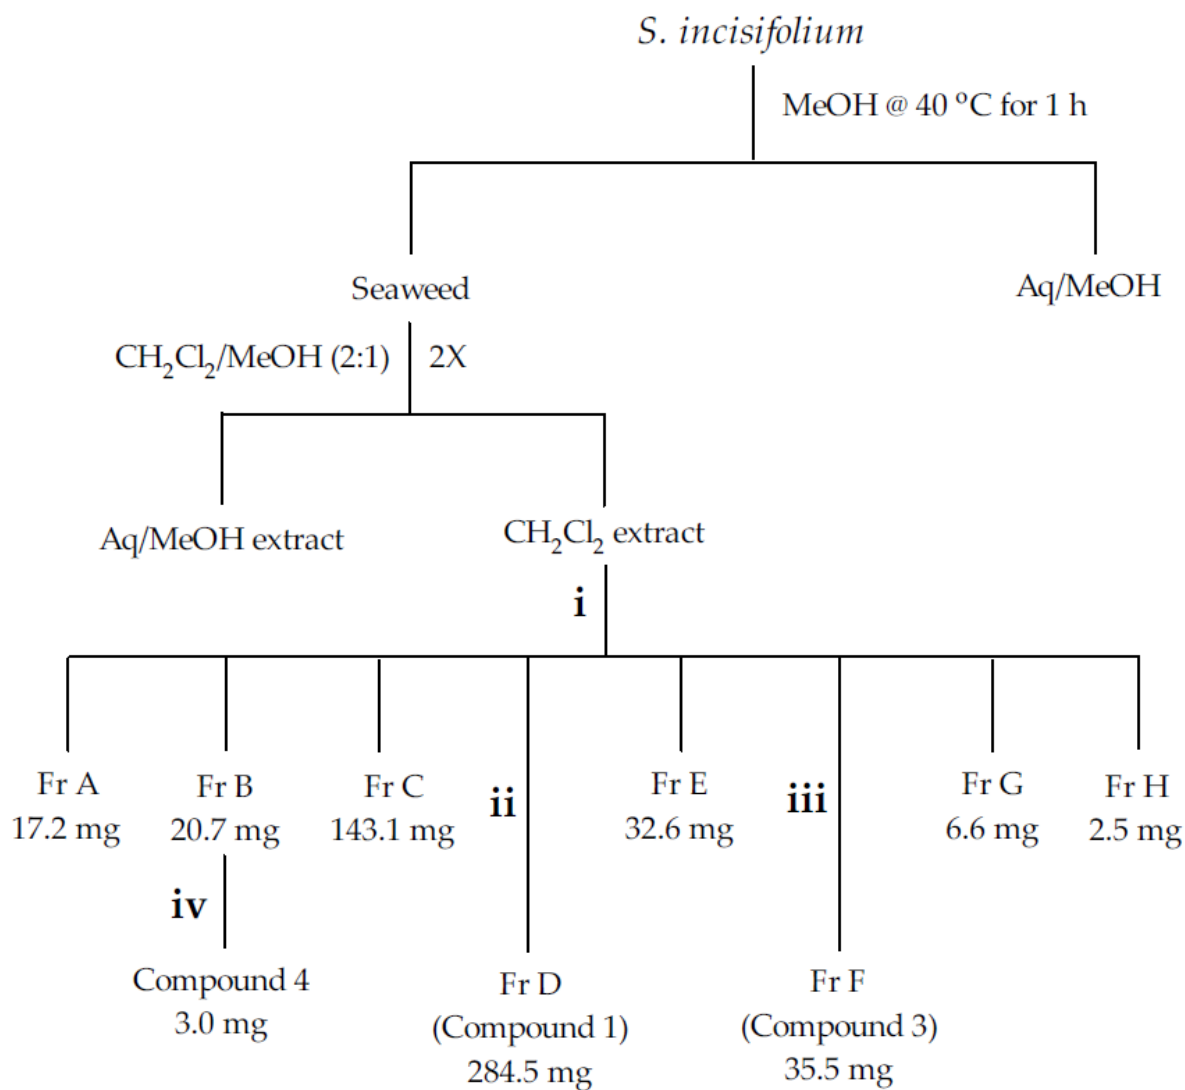

**Scheme S1.** Isolation of compounds **1**, **3**, and **4** from *S. incisifolium*. Conditions: (i) Step gradient silica gel column chromatography, mobile phase *n*-hexane-EtOAc. (ii) Silica gel column fraction, *n*-hexane-EtOAc (7:3). (iii) Silica gel column fraction, *n*-hexane-EtOAc (4:6). (iv) Normal Phase HPLC fraction, *n*-hexane-EtOAc (9:1).

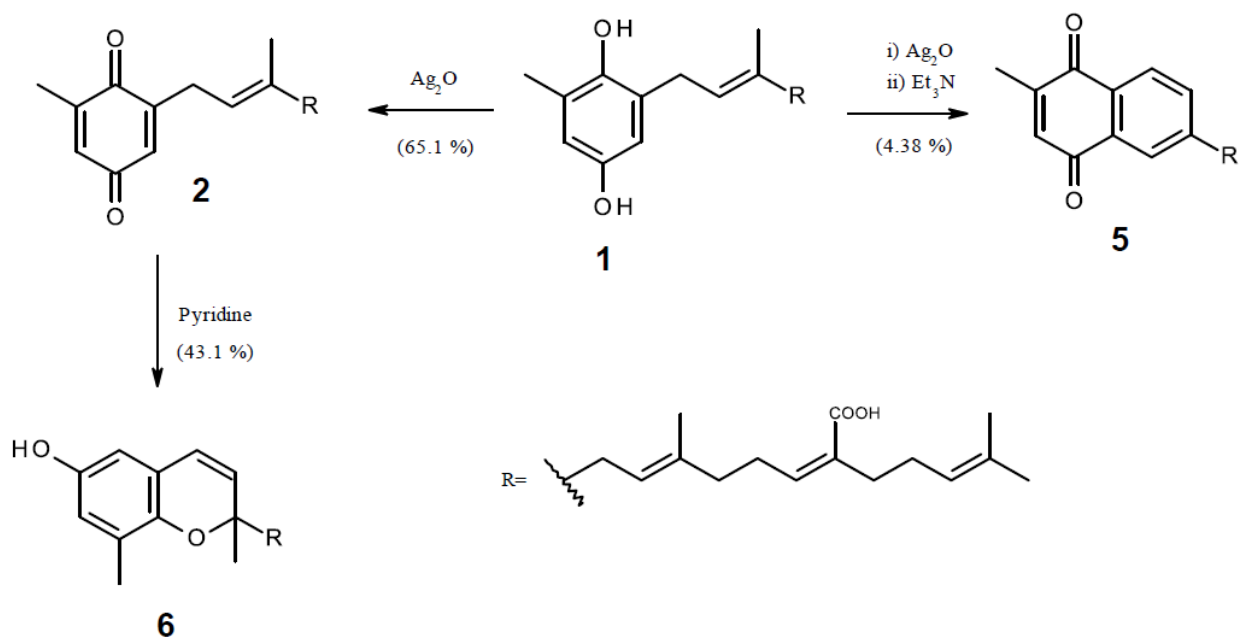

**Scheme S2.** Semi-synthetic derivatization of sargahydroquinoinic acid (1) analogs; 2, 5, and 6.
